# Supplementary material for: The Sum of Two Halves May Be Different from the Whole—Effects of Splitting Sequencing Samples Across Lanes
Source: Genes (Basel). 2022 Dec 1;13(12):2265. doi: 10.3390/genes13122265 (PMC9777937; doi:10.3390/genes13122265)
Supplement: Supplementary file 1 [file genes-13-02265-s001.zip › Supplementary table S1.xlsx]

## Sheet: Sheet1
Study case	Simulation	N Unique Reads				Fraction Uniquely Mapped Reads				nCount				nFeatures				mean Gene Abundances
		GT	S1	S2	S3	GT	S1	S2	S3	GT	S1	S2	S3	GT	S1	S2	S3	GT	S1	S2	S3
Case 1	GT	1	0	0	0	1	1	1	1	1	1	1	1	1	0.0914	0.1275	0.1275	1	0	0	0
	S1	0	1	1	1	1	1	1	1	1	1	1	1	0.0914	1	1	1	0	1	0.9997	1
	S2	0	1	1	1	1	1	1	1	1	1	1	1	0.1275	1	1	1	0	0.9997	1	1
	S3	0	1	1	1	1	1	1	1	1	1	1	1	0.1275	1	1	1	0	1	1	1
Case 2	GT	1	0	0	0	1	1	1	1	1	1	1	1	1	0.1786	0.1786	0.1309	1	0	0	0
	S1	0	1	1	1	1	1	1	1	1	1	1	1	0.1786	1	1	1	0	1	1	1
	S2	0	1	1	1	1	1	1	1	1	1	1	1	0.1786	1	1	1	0	1	1	1
	S3	0	1	1	1	1	1	1	1	1	1	1	1	0.1309	1	1	1	0	1	1	1
Case 3	GT	1	0	0	0	1	1	1	1	1	1	1	1	1	0.0014	0.0009	0.0009	1	0	0	0
	S1	0	1	1	1	1	1	1	1	1	1	1	1	0.0014	1	1	1	0	1	1	1
	S2	0	1	1	1	1	1	1	1	1	1	1	1	0.0009	1	1	1	0	1	1	1
	S3	0	1	1	1	1	1	1	1	1	1	1	1	0.0009	1	1	1	0	1	1	1
Case 5	GT	1	0	0	0	1	1	1	1	1	1	1	1	1	0.0485	0.0485	0.0649	1	0	0	0
	S1	0	1	1	1	1	1	1	1	1	1	1	1	0.0485	1	1	1	0	1	1	0.9979
	S2	0	1	1	1	1	1	1	1	1	1	1	1	0.0485	1	1	1	0	1	1	0.9999
	S3	0	1	1	1	1	1	1	1	1	1	1	1	0.0649	1	1	1	0	0.9979	0.9999	1
Case 6	GT	1	0	0	0	1	1	1	1	1	1	1	1	1	0.0447	0.0447	0.0447	1	0.0001	0.0001	0
	S1	0	1	1	1	1	1	1	1	1	1	1	1	0.0447	1	1	1	0.0001	1	1	1
	S2	0	1	1	1	1	1	1	1	1	1	1	1	0.0447	1	1	1	0.0001	1	1	0.9995
	S3	0	1	1	1	1	1	1	1	1	1	1	1	0.0447	1	1	1	0	1	0.9995	1
Case 8	GT	1	0	0	0	1	1	1	1	1	1	1	1	1	0.0695	0.0539	0.0695	1	0	0	0
	S1	0	1	1	1	1	1	1	1	1	1	1	1	0.0695	1	1	1	0	1	1	1
	S2	0	1	1	1	1	1	1	1	1	1	1	1	0.0539	1	1	1	0	1	1	1
	S3	0	1	1	1	1	1	1	1	1	1	1	1	0.0695	1	1	1	0	1	1	1
