# Supplementary material for: The Sum of Two Halves May Be Different from the Whole—Effects of Splitting Sequencing Samples Across Lanes
Source: Genes (Basel). 2022 Dec 1;13(12):2265. doi: 10.3390/genes13122265 (PMC9777937; doi:10.3390/genes13122265)
Supplement: Supplementary file 1 [file genes-13-02265-s001.zip › Supplementary table S2.xlsx]

## Sheet: Sheet1
Study case	Simulation	N Unique Reads				Fraction Uniquely Mapped Reads				nCount				nFeatures				mean Gene Abundances
		GT	S1	S2	S3	GT	S1	S2	S3	GT	S1	S2	S3	GT	S1	S2	S3	GT	S1	S2	S3
Case 1	GT	0	0.0002	0.0002	0.0002	0	0	0	0	0	0	0	0	0	0.0001	0.0007	0.0004	0	0.0085	0.0089	0.008
	S1	0.0002	0	0	0	0	0	0	0	0	0	0	0	0.0005	0	0.0009	0.0006	0.0092	0	0.0003	0.0007
	S2	0.0002	0	0	0	0	0	0	0	0	0	0	0	0.0004	0.0008	0	0.0002	0.0096	0.0004	0	0.001
	S3	0.0002	0	0	0	0	0	0	0	0	0	0	0	0.0001	0.0005	0.0003	0	0.0086	0.0005	0.0009	0
Case 2	GT	0	0.0002	0.0002	0.0002	0	0	0	0	0	0	0	0	0	0.0019	0.0024	0.0016	0	0.0073	0.0072	0.007
	S1	0.0002	0	0	0	0	0	0	0	0	0	0	0	0.0018	0	0.0005	0.0003	0.008	0	0.0003	0.0005
	S2	0.0002	0	0	0	0	0	0	0	0	0	0	0	0.0023	0.0004	0	0.0008	0.0077	0.0003	0	0.0002
	S3	0.0002	0	0	0	0	0	0	0	0	0	0	0	0.0014	0.0003	0.0008	0	0.0076	0.0004	0.0001	0
Case 3	GT	0	0.0002	0.0002	0.0002	0	0	0	0	0	0	0	0	0	0.0022	0.0012	0.0011	0	0.0191	0.0194	0.0186
	S1	0.0002	0	0	0	0	0	0	0	0	0	0	0	0.0039	0	0.0008	0.0011	0.021	0	0.0004	0.0005
	S2	0.0002	0	0	0	0	0	0	0	0	0	0	0	0.0035	0.0007	0	0.0004	0.0214	0.0004	0	0.0009
	S3	0.0002	0	0	0	0	0	0	0	0	0	0	0	0.0029	0.001	0.0003	0	0.0205	0.0004	0.0008	0
Case 5	GT	0	0.0002	0.0002	0.0002	0	0	0	0	0	0	0	0	0	0.0065	0.0067	0.0078	0	0.0147	0.0142	0.0139
	S1	0.0002	0	0	0	0	0	0	0	0	0	0	0	0.0054	0	0.0001	0.0011	0.0162	0	0.0005	0.0009
	S2	0.0002	0	0	0	0	0	0	0	0	0	0	0	0.0055	0.0001	0	0.001	0.0156	0.0005	0	0.0005
	S3	0.0002	0	0	0	0	0	0	0	0	0	0	0	0.0064	0.0011	0.001	0	0.0152	0.0008	0.0003	0
Case 6	GT	0	0.0002	0.0002	0.0002	0	0	0	0	0	0	0	0	0	0.0002	0.0001	0.0002	0	0.0086	0.0085	0.0095
	S1	0.0001	0	0	0	0	0	0	0	0	0	0	0	0.0026	0	0.0004	0.0003	0.0093	0	0.0001	0.0009
	S2	0.0001	0	0	0	0	0	0	0	0	0	0	0	0.0032	0.0005	0	0.0002	0.0092	0.0001	0	0.0011
	S3	0.0001	0	0	0	0	0	0	0	0	0	0	0	0.0033	0.0003	0.0001	0	0.0103	0.001	0.0011	0
Case 8	GT	0	0.0002	0.0002	0.0002	0	0	0	0	0	0	0	0	0	0.0036	0.0042	0.0039	0	0.0165	0.0164	0.0158
	S1	0.0001	0	0	0	0	0	0	0	0	0	0	0	0.0033	0	0.0006	0.0003	0.018	0	0.0001	0.0008
	S2	0.0001	0	0	0	0	0	0	0	0	0	0	0	0.0039	0.0005	0	0.0003	0.0179	0.0001	0	0.0006
	S3	0.0001	0	0	0	0	0	0	0	0	0	0	0	0.0036	0.0002	0.0003	0	0.0172	0.0007	0.0006	0
